# Supplementary material
Source: publisher figshare collection journal article supplement (https://frontiersin.figshare.com/ndownloader/files/11255393)
Supplement: Supplementary file [file 11255393]

## *Supplementary Material*

# **Mechanically Robust and Thermally Stable Colorful Superamphiphobic Coatings**

Ning Tian,<sup>1,2</sup> Penglin Zhang,<sup>2</sup> and Junping Zhang<sup>1\*</sup>

\* **Correspondence:** Junping Zhang [jpzhang@licp.cas.cn](mailto:jpzhang@licp.cas.cn)

## **1 Supplementary Figures and Tables**

### **1.1 Supplementary Figures**

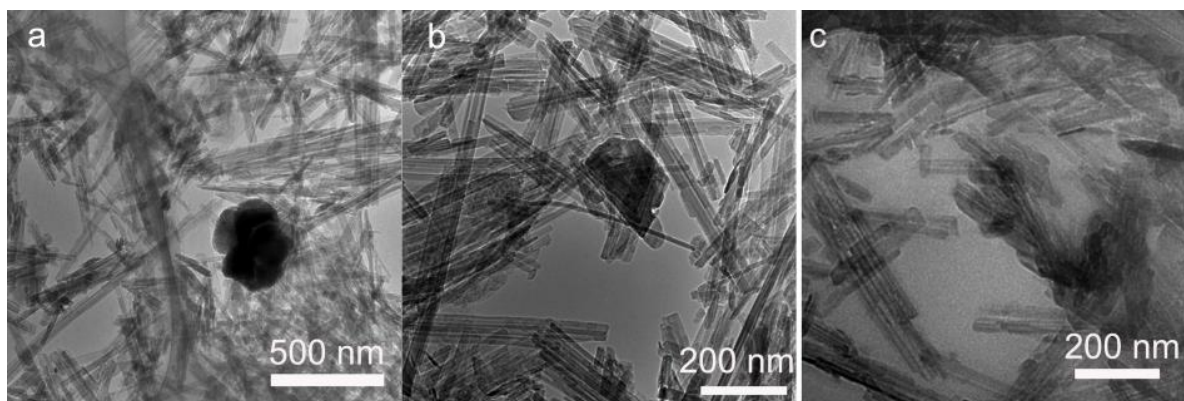

**Supplementary Figure S1.** TEM images of (a, b) PAL/IOR and (c) PAL/IOR@fluoroPOS.

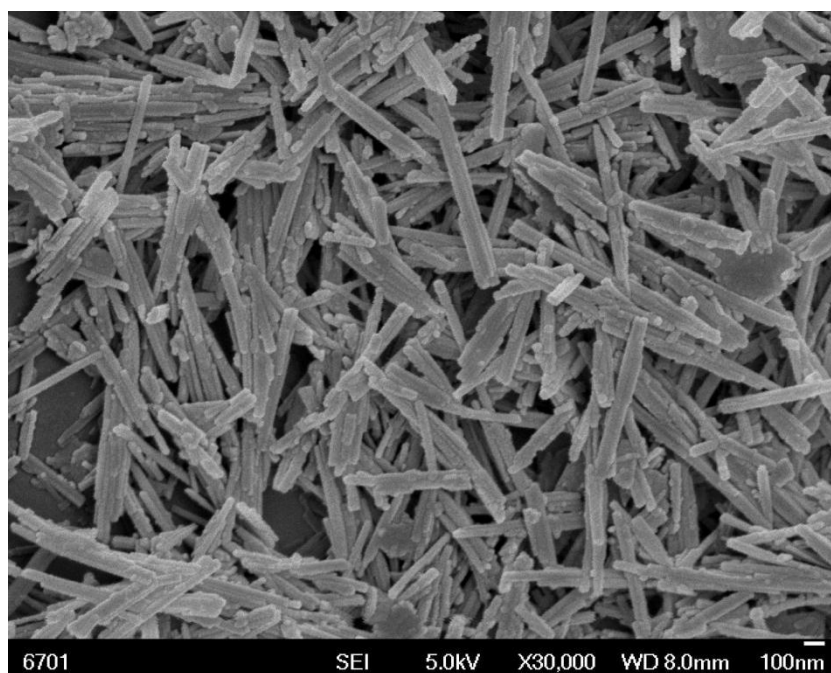

**Supplementary Figure S2.** SEM images of PAL.

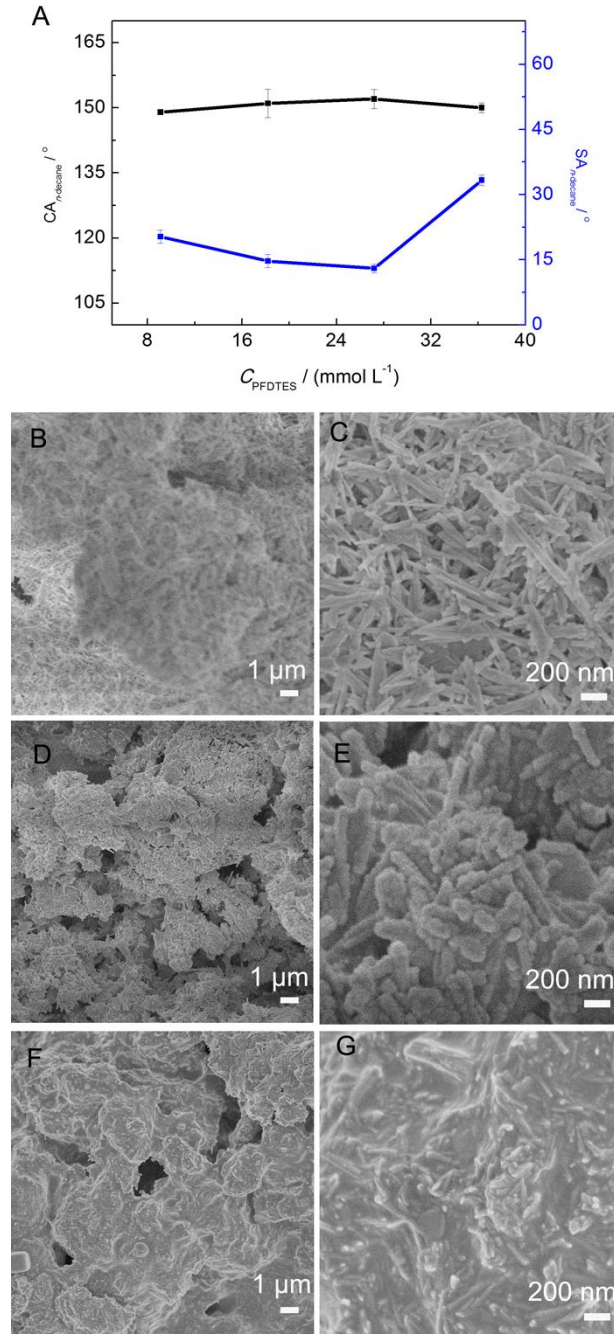

**Supplementary Figure S3** (a) Variation of CA<sub>n-decane</sub> and SA<sub>n-decane</sub> of the PAL/IOR@fluoroPOS coatings with C<sub>PFDTES</sub>. SEM images of the PAL/IOR@fluoroPOS coatings with a C<sub>PFDTES</sub> of (b-c) 9.1 mM, (d-e) 27.2 mM and (f-g) 36.3 mM. C<sub>PAL/IOR</sub> = 14 g L<sup>-1</sup>, t<sub>grinding</sub> = 20 min, C<sub>TEOS</sub> = 4.5 mM.

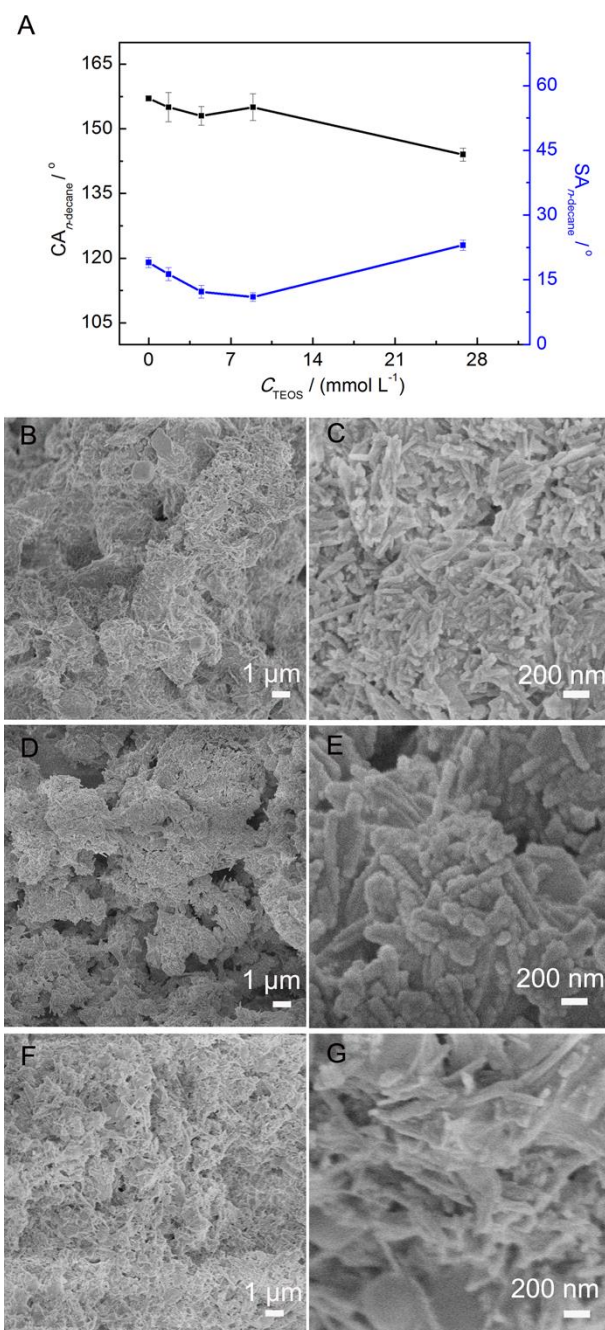

**Supplementary Figure S4.** (a) Variation of  $CA_{n\text{-decane}}$  and  $SA_{n\text{-decane}}$  of the PAL/IOR@fluoroPOS coatings with  $C_{\text{TEOS}}$ . SEM images of the PAL/IOR@fluoroPOS coatings with a  $C_{\text{TEOS}}$  of (b-c) 0 mM, (d-e) 4.5 mM and (f-g) 8.9 mM.  $C_{\text{PAL/IOR}} = 14 \text{ g L}^{-1}$ ,  $t_{\text{grinding}} = 20 \text{ min}$ ,  $C_{\text{PFDTES}} = 27.2 \text{ mM}$ .

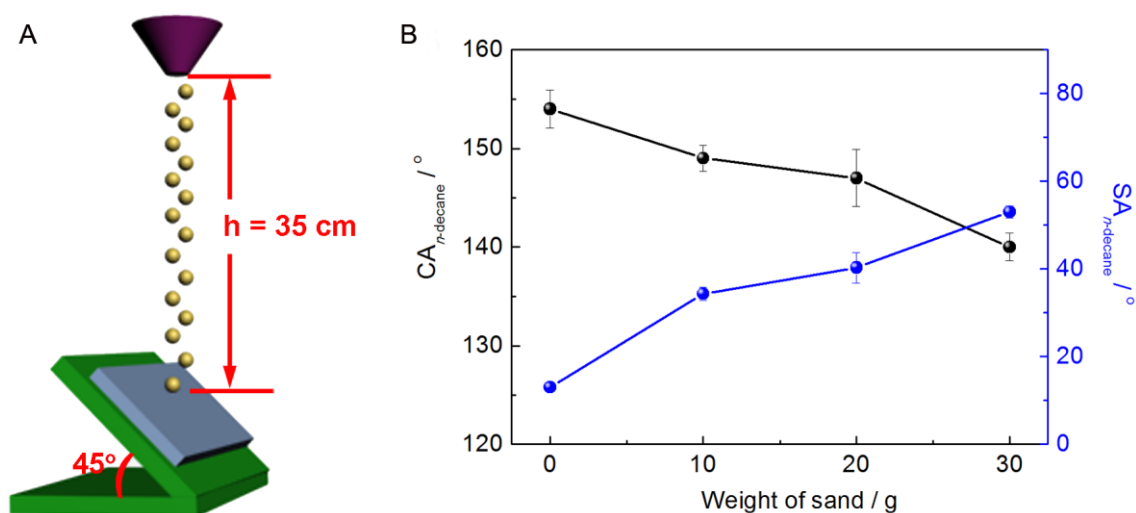

**Supplementary Figure S5.** (a) Schematic illustration of the falling sand test. (b) Variation of  $CA_{n\text{-decane}}$  and  $SA_{n\text{-decane}}$  of the PAL/IOR@fluoroPOS coating with weight of sand in the falling sand test.

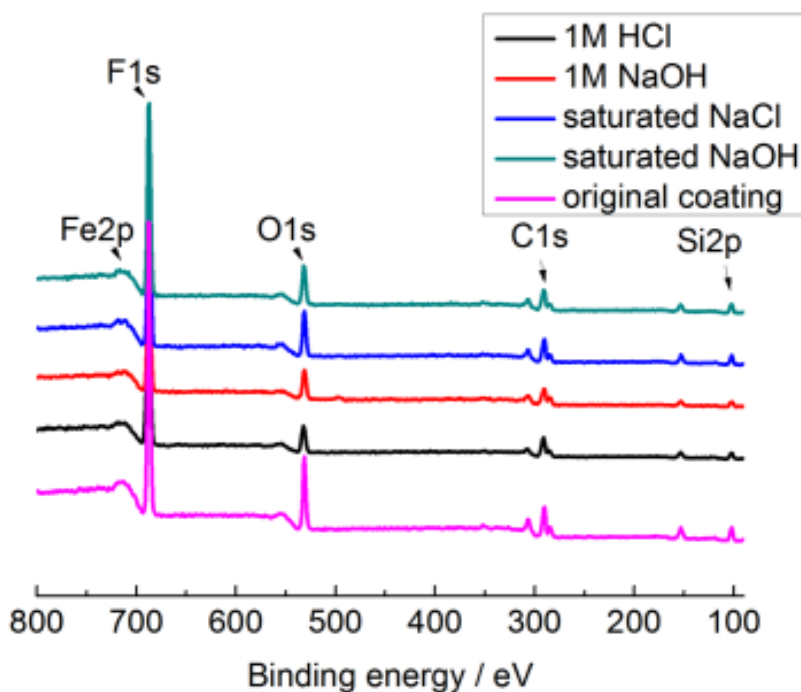

**Supplementary Figure S6.** (a) XPS spectra of the PAL/IOR@fluoroPOS coatings after immersed in various liquids for 24 h with the original coating for comparison.  $C_{\text{PAL/IOR}} = 14 \text{ g L}^{-1}$ ,  $t_{\text{grinding}} = 20 \text{ min}$ ,  $C_{\text{PFDTES}} = 27.2 \text{ mM}$ ,  $C_{\text{TEOS}} = 4.5 \text{ mM}$ .



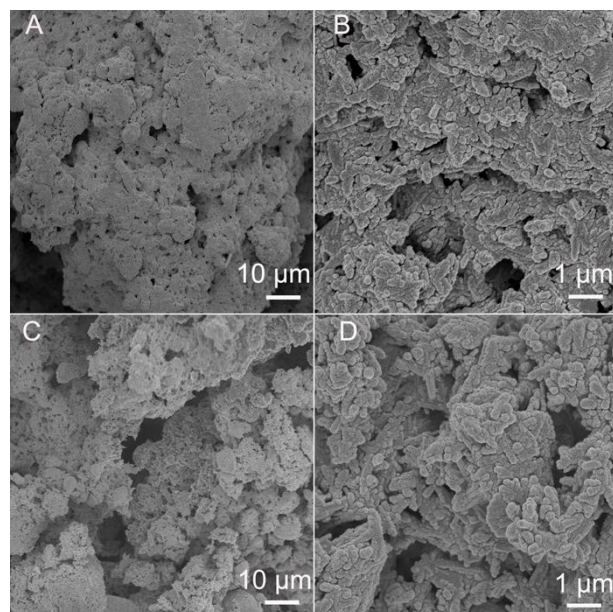

**Supplementary Figure S7.** SEM images of PAL/IOR@fluoroPOS coatings after immersion in (a-b) 1 M HCl and (c-d) 1M NaOH for 24 h.  $C_{\text{PAL/IOR}} = 14 \text{ g L}^{-1}$ ,  $t_{\text{grinding}} = 20 \text{ min}$ ,  $C_{\text{PFDTES}} = 27.2 \text{ mM}$ ,  $C_{\text{TEOS}} = 4.5 \text{ mM}$ .

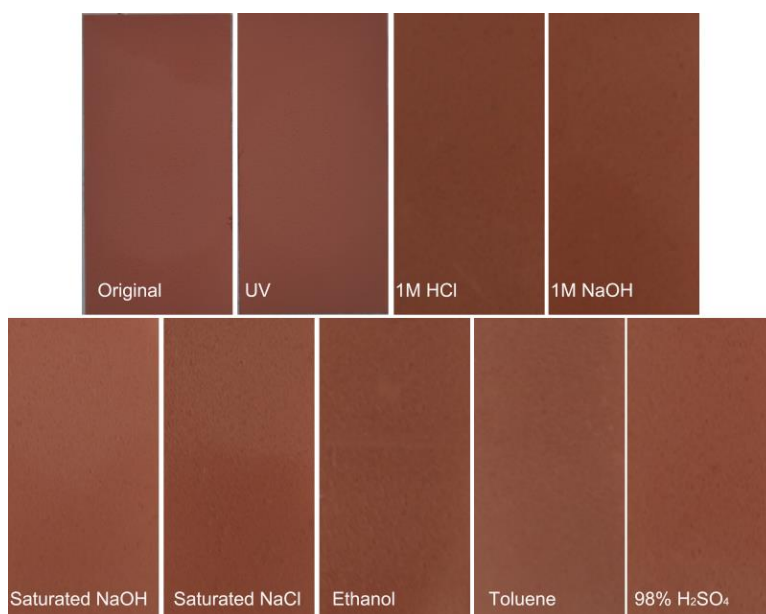

**Supplementary Figure S8.** Digital images of the PAL/IOR@fluoroPOS coatings after immersed in different liquids or exposed to UV irradiation for 24 h.  $C_{\text{PAL/IOR}} = 14 \text{ g L}^{-1}$ ,  $t_{\text{grinding}} = 20 \text{ min}$ ,  $C_{\text{PFDTES}} = 27.2 \text{ mM}$ ,  $C_{\text{TEOS}} = 4.5 \text{ mM}$ .

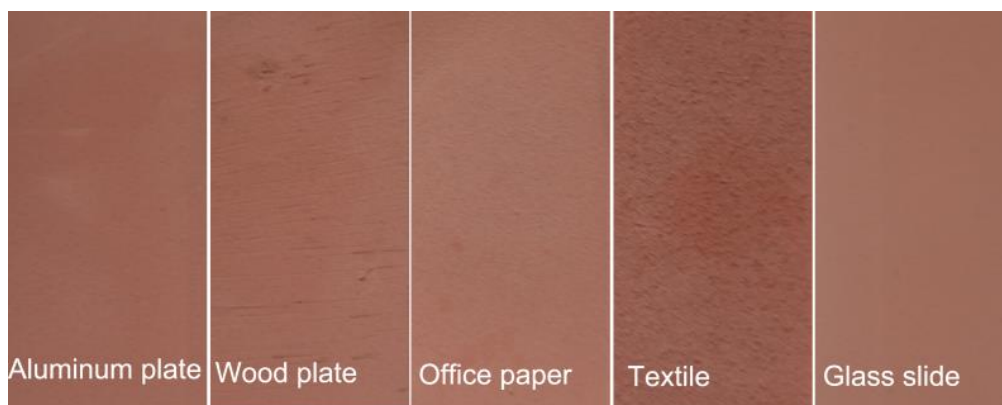

**Supplementary Figure S9.** PAL/IR@fluoroPOS coatings on different substrates.  $C_{\text{PAL/IR}} = 14 \text{ g L}^{-1}$ ,  $t_{\text{grinding}} = 20 \text{ min}$ ,  $C_{\text{PFDTES}} = 27.2 \text{ mM}$ ,  $C_{\text{TEOS}} = 4.5 \text{ mM}$ .

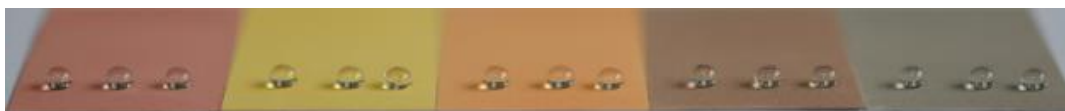

**Supplementary Figure S10.** Soybean oil, *n*-dodecane and *n*-decane droplets (left to right) on the superamphiphobic coatings based on (a) IOR, (b) IOY, (c) IOO, (d) IOBR and (e) IOBL.  $C_{\text{PAL/iron oxides}} = 14 \text{ g L}^{-1}$ ,  $t_{\text{grinding}} = 20 \text{ min}$ ,  $C_{\text{PFDTES}} = 27.2 \text{ mM}$ ,  $C_{\text{TEOS}} = 4.5 \text{ mM}$ .

## 1.2 Supplementary Tables

**Supplementary Table S1.** CAs and SAs of the frequently used oils in our daily life on the PAL/IR@fluoro POS coating at  $20^\circ \text{C}$ .  $C_{\text{PAL/IR}} = 14 \text{ g L}^{-1}$ ,  $t_{\text{grinding}} = 20 \text{ min}$ ,  $C_{\text{PFDTES}} = 27.2 \text{ mM}$ ,  $C_{\text{TEOS}} = 4.5 \text{ mM}$ .

| Liquids         | CAs / $^\circ$ | SAs / $^\circ$ |
|-----------------|----------------|----------------|
| Rapeseed oil    | $160 \pm 2.5$  | $7.2 \pm 1.4$  |
| Diesel          | $163 \pm 2.3$  | $8.5 \pm 1.2$  |
| Vacuum pump oil | $158 \pm 2.6$  | $9.7 \pm 0.58$ |
| Soybean oil     | $160 \pm 2.5$  | $15.0 \pm 1.2$ |

**Supplementary Table S2.**  $CA_{n\text{-decane}}$  and  $SA_{n\text{-decane}}$  of the PAL/IOR@fluoroPOS after treatment under different conditions for 24 h.  $C_{\text{PAL/IOR}} = 14 \text{ g L}^{-1}$ ,  $t_{\text{grinding}} = 20 \text{ min}$ ,  $C_{\text{PFDTES}} = 27.2 \text{ mM}$ ,  $C_{\text{TEOS}} = 4.5 \text{ mM}$ .

|                                              | $CA_{n\text{-decane}} / ^\circ$ | $SA_{n\text{-decane}} / ^\circ$ |
|----------------------------------------------|---------------------------------|---------------------------------|
| Original coating                             | $153 \pm 2.7$                   | $11.8 \pm 2.8$                  |
| 1 M $\text{HCl}_{(\text{aq})}$ , 24 h        | $145 \pm 2.5$                   | $32.7 \pm 2.1$                  |
| 1 M $\text{NaOH}_{(\text{aq})}$ , 24 h       | $145 \pm 2.7$                   | $32.0 \pm 2.1$                  |
| Saturated $\text{NaCl}_{(\text{aq})}$ , 24 h | $146 \pm 4.0$                   | $19.0 \pm 0.6$                  |
| 98 % $\text{H}_2\text{SO}_4$ , 24 h          | $150 \pm 3.0$                   | $20.0 \pm 1.5$                  |
| Saturated $\text{NaOH}_{(\text{aq})}$ , 24 h | $148 \pm 2.0$                   | $29.7 \pm 0.6$                  |
| Ethanol, 24 h                                | $147 \pm 1.9$                   | $28.0 \pm 4.2$                  |
| Toluene, 24 h                                | $149 \pm 1.2$                   | $19.7 \pm 0.6$                  |

**Supplementary Table S3.**  $CA_{n\text{-decane}}$  and  $SA_{n\text{-decane}}$  of the PAL/IOR@fluoroPOS coatings on different substrates.  $C_{\text{PAL/IOR}} = 14 \text{ g L}^{-1}$ ,  $t_{\text{grinding}} = 20 \text{ min}$ ,  $C_{\text{PFDTES}} = 27.2 \text{ mM}$ ,  $C_{\text{TEOS}} = 4.5 \text{ mM}$ .

| Substrates    | $CA_{n\text{-decane}} / ^\circ$ | $SA_{n\text{-decane}} / ^\circ$ |
|---------------|---------------------------------|---------------------------------|
| Glass slide   | $153 \pm 2.7$                   | $11.8 \pm 2.8$                  |
| Office paper  | $150 \pm 3.1$                   | $13.3 \pm 1.2$                  |
| Aluminum foil | $152 \pm 2.3$                   | $17.5 \pm 1.5$                  |
| Wood plate    | $154 \pm 4.0$                   | $19.0 \pm 0.6$                  |



---

|                   |               |                |
|-------------------|---------------|----------------|
| Polyester textile | $146 \pm 3.2$ | $16.5 \pm 1.5$ |
|-------------------|---------------|----------------|

---
